# Supplementary material for: Unraveling the flexible aromaticity of C13H9+/0/−: a 2D superatomic-molecule theory
Source: Royal Society of Chemistry journal article supplement (doi:10.1039/d3cp00125c), 2023-01-01
Supplement: d3cp00125c1.pdf [file d3cp00125c1.pdf]

## Supplementary Information

# Unraveling the flexible aromaticity of $C_{13}H_9^{+0/-}$ : a 2D superatomic-molecule theory

Dan Li,<sup>1</sup> Chen Yan,<sup>1</sup> Qinqin Yuan,<sup>1\*</sup> Lili Shi<sup>1</sup> and Longjiu Cheng<sup>1,2\*</sup>

<sup>1</sup>Department of Chemistry, Anhui University, 111 Jiulong Road, Hefei 230601, P. R. China

<sup>2</sup>Key Laboratory of Structure and Functional Regulation of Hybrid Materials (Anhui University), Ministry of Education, Hefei, 230601, P. R. China.

\*Corresponding authors. Email: qinqinyuan@ahu.edu.cn, clj@ustc.edu

### Contents:

1. **Fig. S1** NICS<sub>zz</sub>(1) contour planes (ppm) of  $C_{13}H_9^+$ ,  $C_{13}H_9^\bullet$  and  $C_{13}H_9^-$ .
2. **Fig. S2** Chemical bonding picture of  $C_{13}H_9^+$ .
3. **Fig. S3** Chemical bonding picture of  $N_3^+$ .
4. **Fig. S4** Chemical bonding picture of  $C_{13}H_9^-$ .
5. **Fig. S5** Chemical bonding picture of  $O_3^{2-}$ .
6. **Fig. S6** Chemical bonding picture of  $C_{13}H_9^\bullet$ .
7. **Fig. S7** Chemical bonding picture of  $C_7N_6H_3^-$ .
8. **Fig. S8** Chemical bonding picture of  $C_6N_7H_3$ .
9. **Fig. S9** Canonical MO diagrams and AdNDP bonding patterns of (a)  $C_{12}BH_9$  and (b)  $C_{12}NH_9$ . Only  $\pi$  frameworks are presented.
10. **Fig. S10** NICS(1) contour planes (ppm) of  $C_{12}BH_9$  (left) and  $C_{12}NH_9$  (right).
11. **Fig. S11** Chemical bonding picture of  $C_{18}H_6N_{22}$ .
12. **Fig. S12** Chemical bonding picture of g- $C_3N_4$  crystal ( $2 \times 2$  supercell).
13. **Cartesian coordinates (in Å) of the optimized geometries.**
14. **Structural information of g- $C_3N_4$  monolayer.**

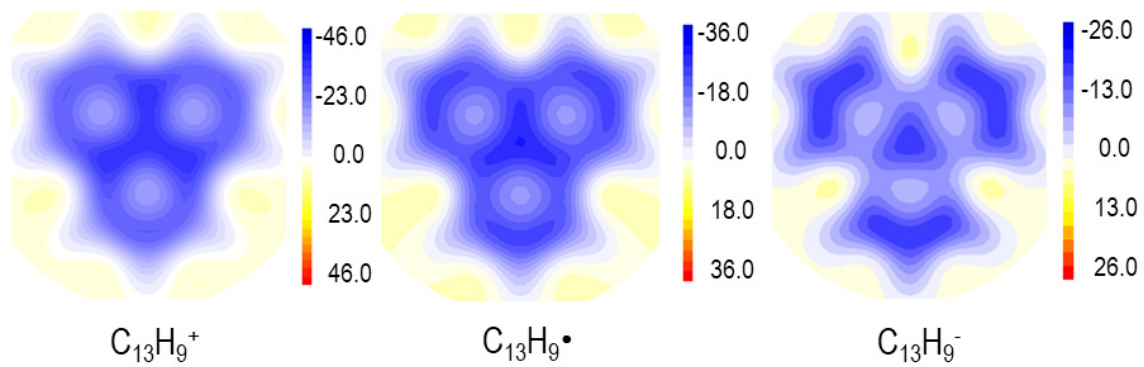

**Fig. S1** NICS<sub>zz</sub>(1) contour planes (ppm) of  $C_{13}H_9^+$ ,  $C_{13}H_9^\bullet$  and  $C_{13}H_9^-$ .

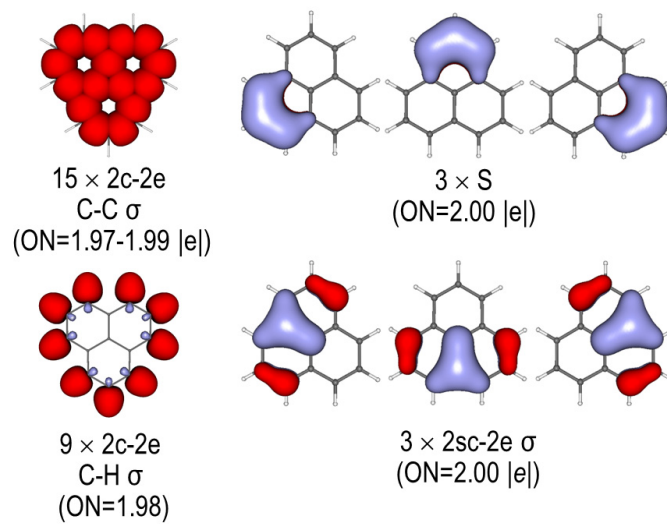

**Fig. S2** Chemical bonding picture of C<sub>13</sub>H<sub>9</sub><sup>+</sup>.

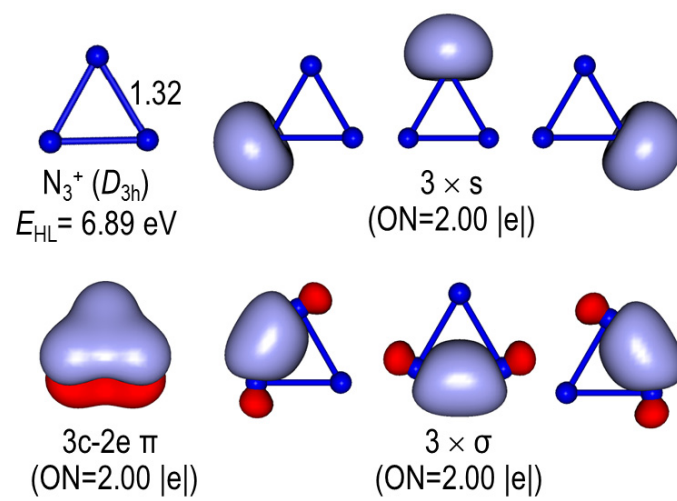

**Fig. S3** Chemical bonding picture of  $N_3^+$ .

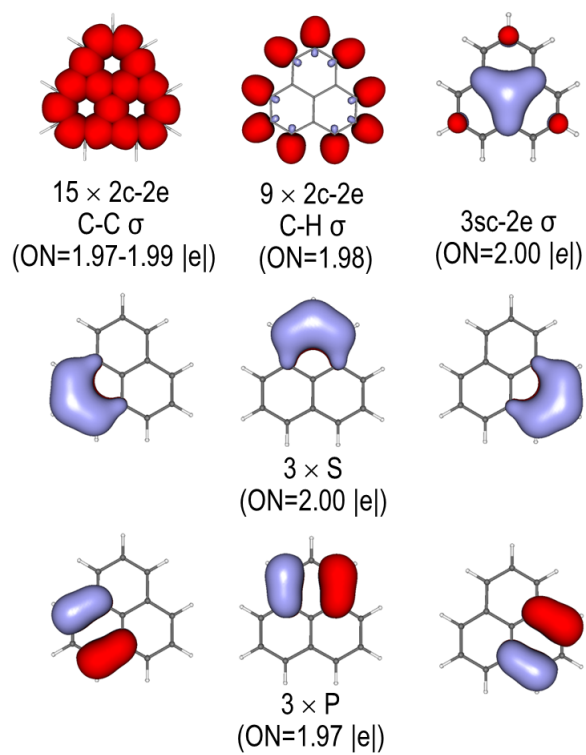

**Fig. S4** Chemical bonding picture of  $C_{13}H_9^-$ .

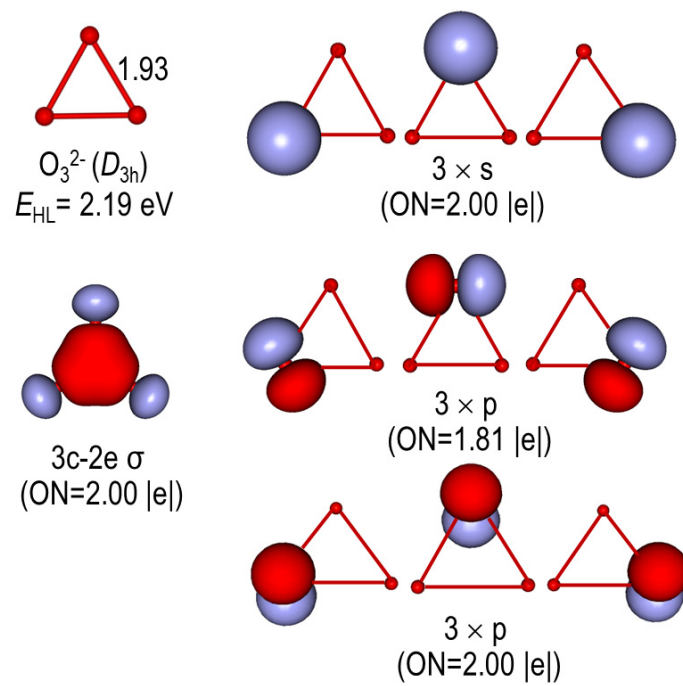

**Fig. S5** Chemical bonding picture of  $O_3^{2-}$ .

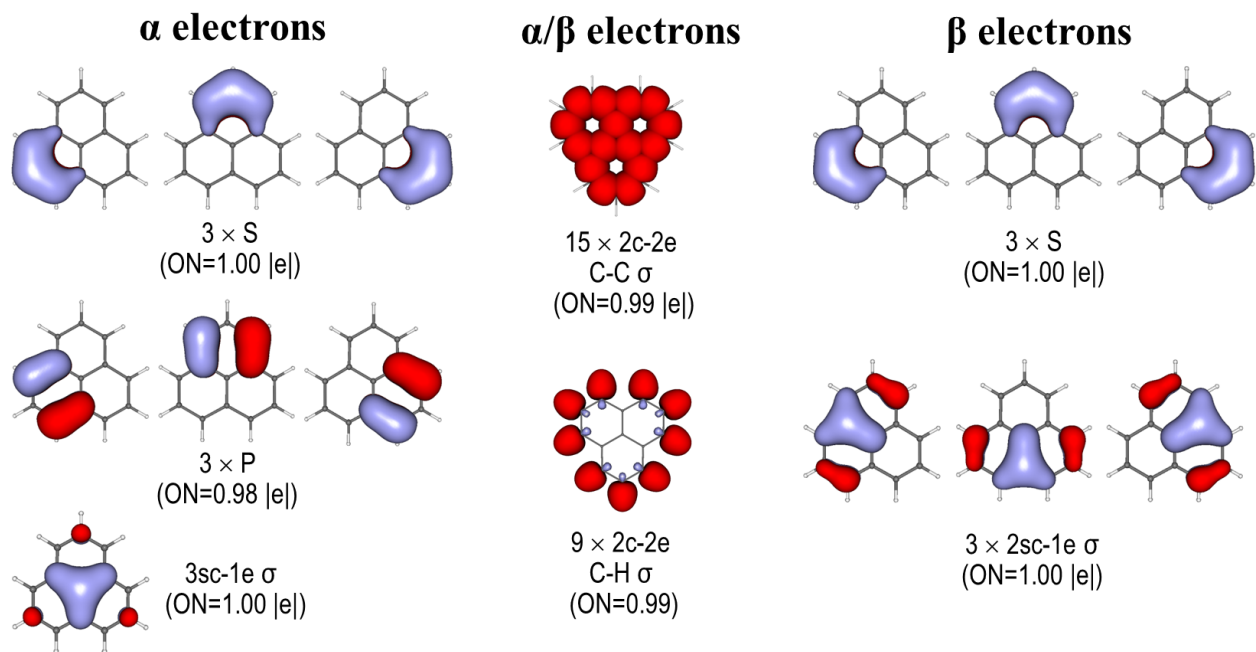

**Fig. S6** Chemical bonding picture of  $C_{13}H_9\bullet$ .

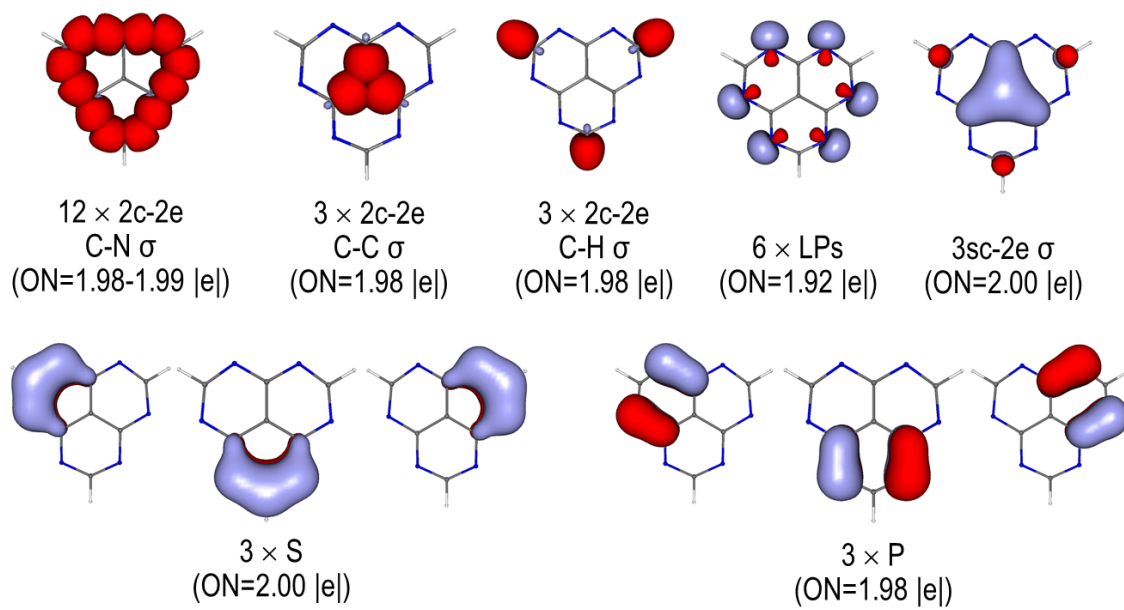

**Fig. S7** Chemical bonding picture of  $\text{C}_7\text{N}_6\text{H}_3^-$ .



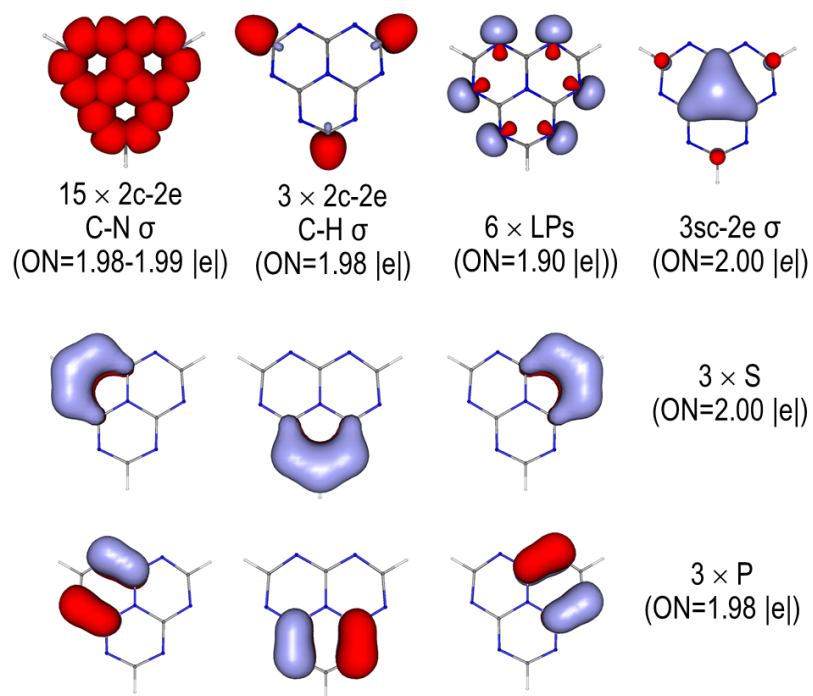

**Fig. S8** Chemical bonding picture of C<sub>6</sub>N<sub>7</sub>H<sub>3</sub>.

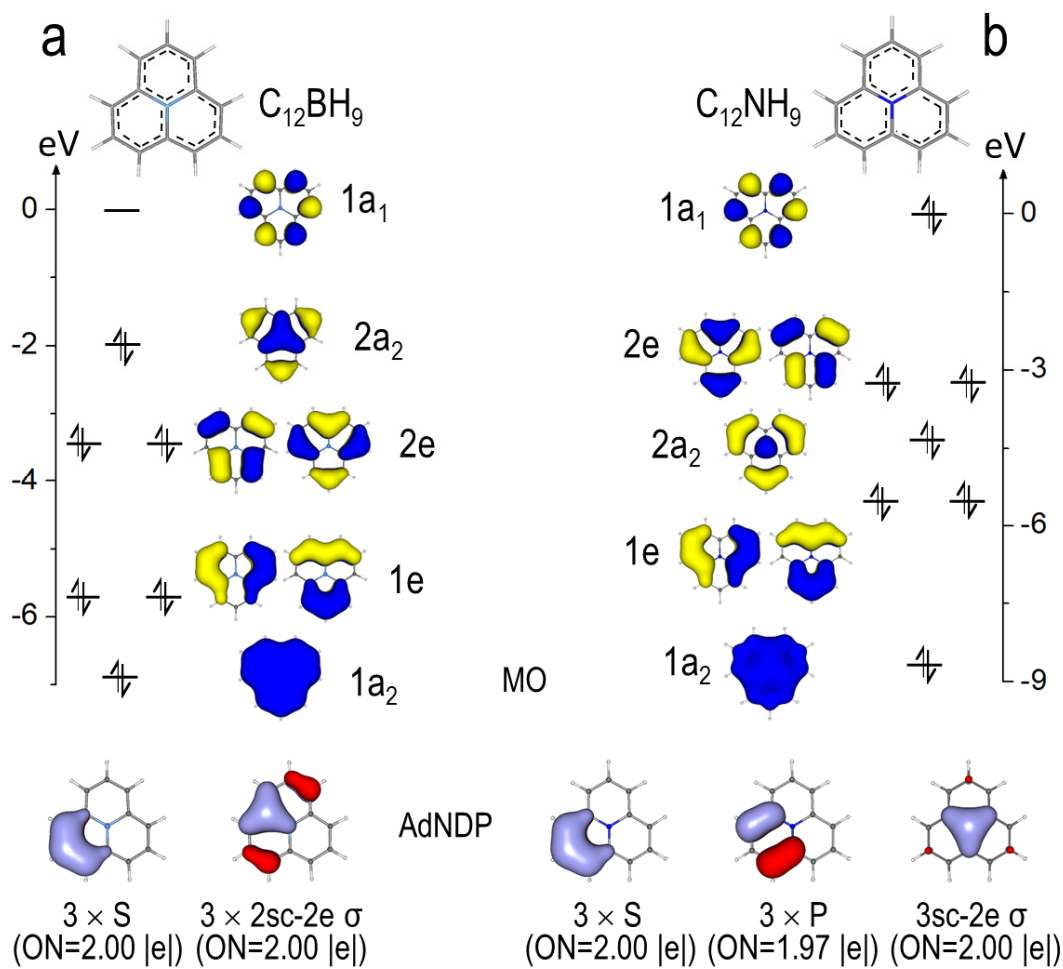

**Fig. S9** Canonical MO diagrams and AdNDP bonding patterns of (a)  $C_{12}BH_9$  and (b)  $C_{12}NH_9$ . Only  $\pi$  frameworks are presented.

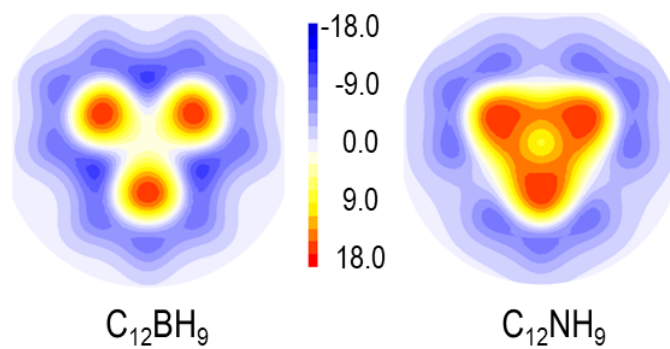

**Fig. S10** NICS(1) contour planes (ppm) of  $C_{12}BH_9$  (left) and  $C_{12}NH_9$  (right).

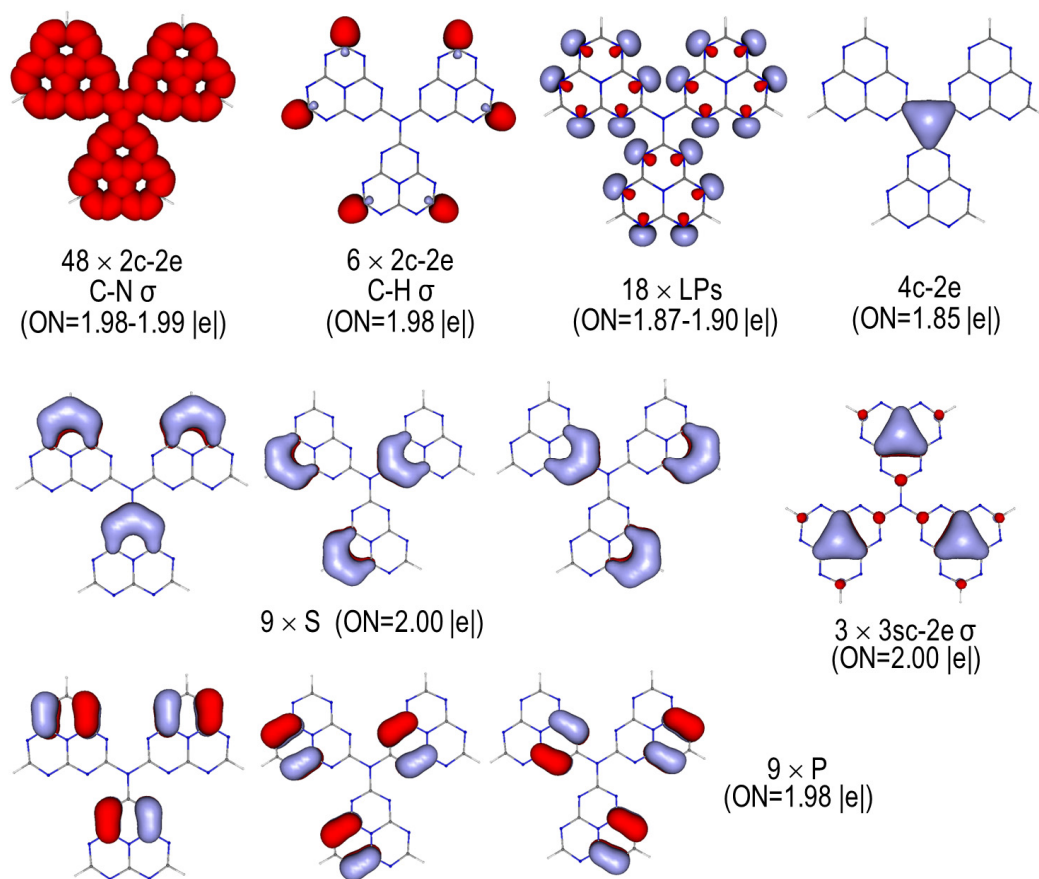

**Fig. S11** Chemical bonding picture of  $C_{18}H_6N_{22}$ .

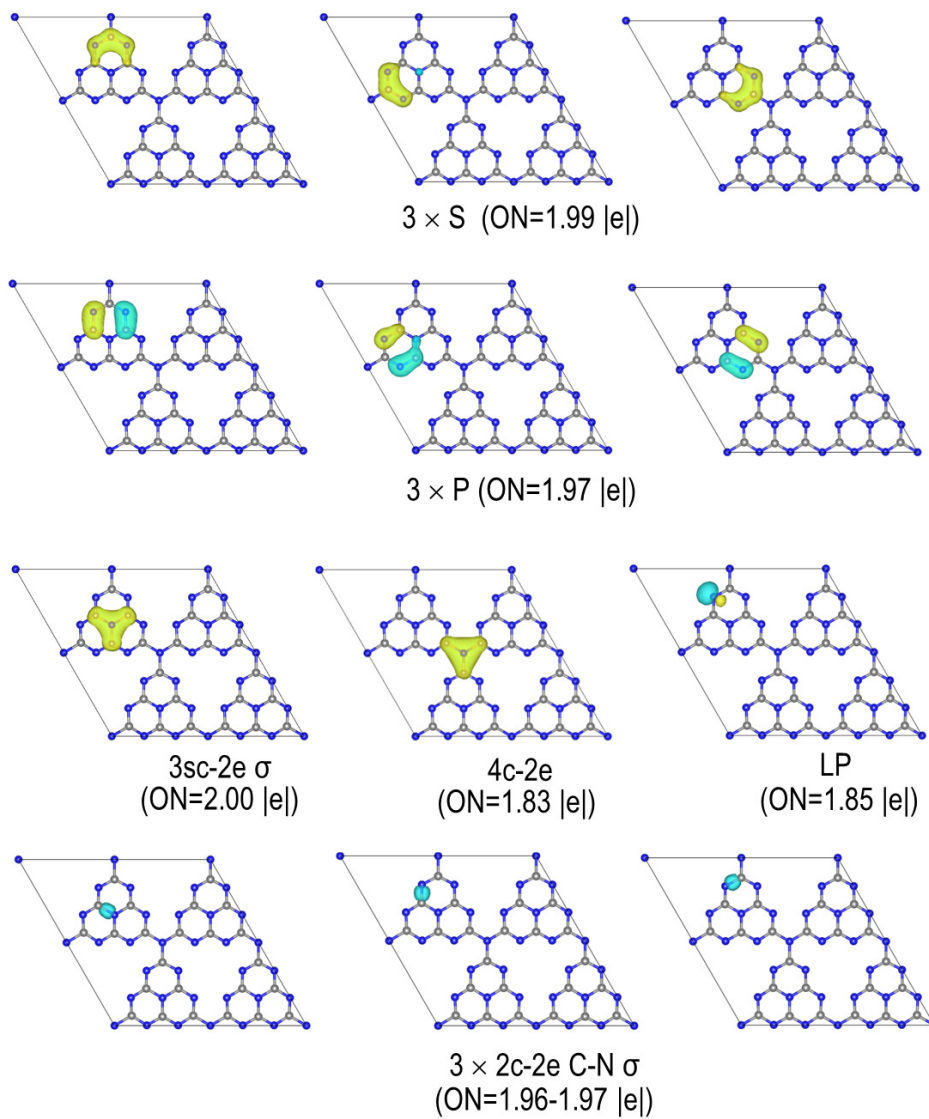

**Fig. S12** Chemical bonding picture of g-C<sub>3</sub>N<sub>4</sub> crystal (2×2 supercell).

**Cartesian coordinates (in Å) of the optimized geometries.**

|                                             |           | <i>x</i>  | <i>y</i>  | <i>z</i> |
|---------------------------------------------|-----------|-----------|-----------|----------|
| C <sub>13</sub> H <sub>9</sub> <sup>-</sup> | C         | 0.000000  | 0.000000  | 0.000000 |
|                                             | C         | 1.247239  | 2.122915  | 0.000000 |
|                                             | C         | 2.462118  | 0.018683  | 0.000000 |
|                                             | C         | -2.462118 | 0.018683  | 0.000000 |
|                                             | C         | -1.247239 | 2.122915  | 0.000000 |
|                                             | C         | 1.214879  | -2.141598 | 0.000000 |
|                                             | C         | -1.214879 | -2.141598 | 0.000000 |
|                                             | C         | 0.000000  | 1.441795  | 0.000000 |
|                                             | C         | 1.248631  | -0.720898 | 0.000000 |
|                                             | C         | 2.441253  | 1.409458  | 0.000000 |
|                                             | C         | -1.248631 | -0.720898 | 0.000000 |
|                                             | C         | -2.441253 | 1.409458  | 0.000000 |
|                                             | C         | 0.000000  | -2.818916 | 0.000000 |
|                                             | H         | 1.254204  | 3.209172  | 0.000000 |
|                                             | H         | 3.406326  | -0.518413 | 0.000000 |
|                                             | H         | 3.383832  | 1.953656  | 0.000000 |
|                                             | H         | -3.406326 | -0.518413 | 0.000000 |
|                                             | H         | -3.383832 | 1.953656  | 0.000000 |
|                                             | H         | -1.254204 | 3.209172  | 0.000000 |
|                                             | H         | 2.152122  | -2.690759 | 0.000000 |
| H                                           | 0.000000  | -3.907312 | 0.000000  |          |
| H                                           | -2.152122 | -2.690759 | 0.000000  |          |
| C <sub>13</sub> H <sub>9</sub> <sup>+</sup> | C         | 0.000000  | 0.000000  | 0.000000 |
|                                             | C         | 1.238068  | 2.105669  | 0.000000 |
|                                             | C         | 2.442597  | 0.019364  | 0.000000 |
|                                             | C         | -2.442597 | 0.019364  | 0.000000 |
|                                             | C         | -1.238068 | 2.105669  | 0.000000 |
|                                             | C         | 1.204529  | -2.125033 | 0.000000 |
|                                             | C         | -1.204529 | -2.125033 | 0.000000 |
|                                             | C         | 0.000000  | 1.420136  | 0.000000 |
|                                             | C         | 1.229874  | -0.710068 | 0.000000 |
|                                             | C         | 2.443471  | 1.410739  | 0.000000 |
|                                             | C         | -1.229874 | -0.710068 | 0.000000 |
|                                             | C         | -2.443471 | 1.410739  | 0.000000 |
|                                             | C         | 0.000000  | -2.821478 | 0.000000 |

|                                                           |   |           |           |          |
|-----------------------------------------------------------|---|-----------|-----------|----------|
|                                                           | H | 1.240911  | 3.190497  | 0.000000 |
|                                                           | H | 3.383507  | -0.520588 | 0.000000 |
|                                                           | H | 3.380922  | 1.951976  | 0.000000 |
|                                                           | H | -3.383507 | -0.520588 | 0.000000 |
|                                                           | H | -3.380922 | 1.951976  | 0.000000 |
|                                                           | H | -1.240911 | 3.190497  | 0.000000 |
|                                                           | H | 2.142596  | -2.669909 | 0.000000 |
|                                                           | H | 0.000000  | -3.903953 | 0.000000 |
|                                                           | H | -2.142596 | -2.669909 | 0.000000 |
| C <sub>13</sub> H <sub>9</sub> •                          | C | 0.000000  | 0.000000  | 0.000000 |
|                                                           | C | 1.241573  | 2.112776  | 0.000000 |
|                                                           | C | 2.450504  | 0.018845  | 0.000000 |
|                                                           | C | -2.450504 | 0.018845  | 0.000000 |
|                                                           | C | -1.241573 | 2.112776  | 0.000000 |
|                                                           | C | 1.208932  | -2.131622 | 0.000000 |
|                                                           | C | -1.208932 | -2.131622 | 0.000000 |
|                                                           | C | 0.000000  | 1.429531  | 0.000000 |
|                                                           | C | 1.23801   | -0.714766 | 0.000000 |
|                                                           | C | 2.441359  | 1.409519  | 0.000000 |
|                                                           | C | -1.23801  | -0.714766 | 0.000000 |
|                                                           | C | -2.441359 | 1.409519  | 0.000000 |
|                                                           | C | 0.000000  | -2.819039 | 0.000000 |
|                                                           | H | 1.244694  | 3.197434  | 0.000000 |
|                                                           | H | 3.391406  | -0.520781 | 0.000000 |
|                                                           | H | 3.380365  | 1.951655  | 0.000000 |
|                                                           | H | -3.391406 | -0.520781 | 0.000000 |
|                                                           | H | -3.380365 | 1.951655  | 0.000000 |
|                                                           | H | -1.244694 | 3.197434  | 0.000000 |
|                                                           | H | 2.146712  | -2.676654 | 0.000000 |
|                                                           | H | 0.000000  | -3.903309 | 0.000000 |
|                                                           | H | -2.146712 | -2.676654 | 0.000000 |
| C <sub>7</sub> N <sub>6</sub> H <sub>3</sub> <sup>-</sup> | C | 0.000000  | 0.000000  | 0.000000 |
|                                                           | N | 1.180623  | 2.082909  | 0.000000 |
|                                                           | N | 2.394164  | -0.019005 | 0.000000 |
|                                                           | N | -2.394164 | -0.019005 | 0.000000 |
|                                                           | N | -1.180623 | 2.082909  | 0.000000 |
|                                                           | N | 1.213541  | -2.063904 | 0.000000 |

|                                                |   |           |           |          |
|------------------------------------------------|---|-----------|-----------|----------|
|                                                | N | -1.213541 | -2.063904 | 0.000000 |
|                                                | C | 0.000000  | 1.415722  | 0.000000 |
|                                                | C | 1.226051  | -0.707861 | 0.000000 |
|                                                | C | 2.270658  | 1.310965  | 0.000000 |
|                                                | C | -1.226051 | -0.707861 | 0.000000 |
|                                                | C | -2.270658 | 1.310965  | 0.000000 |
|                                                | C | 0.000000  | -2.62193  | 0.000000 |
|                                                | H | 3.214831  | 1.856083  | 0.000000 |
|                                                | H | -3.214831 | 1.856083  | 0.000000 |
|                                                | H | 0.000000  | -3.712167 | 0.000000 |
| C <sub>6</sub> N <sub>7</sub> H <sub>3</sub>   | N | 0.000000  | 0.000000  | 0.000000 |
|                                                | N | 1.164564  | 2.055911  | 0.000000 |
|                                                | N | 2.362753  | -0.019414 | 0.000000 |
|                                                | N | -2.362753 | -0.019414 | 0.000000 |
|                                                | N | -1.164564 | 2.055911  | 0.000000 |
|                                                | N | 1.19819   | -2.036497 | 0.000000 |
|                                                | N | -1.19819  | -2.036497 | 0.000000 |
|                                                | C | 0.000000  | 1.407911  | 0.000000 |
|                                                | C | 1.219286  | -0.703955 | 0.000000 |
|                                                | C | 2.264521  | 1.307422  | 0.000000 |
|                                                | C | -1.219286 | -0.703955 | 0.000000 |
|                                                | C | -2.264521 | 1.307422  | 0.000000 |
|                                                | C | 0.000000  | -2.614844 | 0.000000 |
|                                                | H | 3.205329  | 1.850598  | 0.000000 |
|                                                | H | -3.205329 | 1.850598  | 0.000000 |
|                                                | H | 0.000000  | -3.701195 | 0.000000 |
| C <sub>18</sub> N <sub>22</sub> H <sub>6</sub> | N | 0.000000  | 0.000000  | 0.000000 |
|                                                | N | 1.16815   | -6.175955 | 0.000000 |
|                                                | C | 0.000000  | -5.534219 | 0.000000 |
|                                                | C | 1.202716  | -3.411443 | 0.000000 |
|                                                | N | 2.354625  | -4.088356 | 0.000000 |
|                                                | C | 2.262423  | -5.415393 | 0.000000 |
|                                                | C | -1.202716 | -3.411443 | 0.000000 |
|                                                | N | -2.354625 | -4.088356 | 0.000000 |
|                                                | C | -2.262423 | -5.415393 | 0.000000 |
|                                                | N | -1.16815  | -6.175955 | 0.000000 |
|                                                | N | 1.172139  | -2.089635 | 0.000000 |



|  |   |           |           |          |
|--|---|-----------|-----------|----------|
|  | C | 0.000000  | -1.471101 | 0.000000 |
|  | N | -1.172139 | -2.089635 | 0.000000 |
|  | N | -3.576923 | 2.065137  | 0.000000 |
|  | N | -2.363308 | 4.083344  | 0.000000 |
|  | C | -2.353038 | 2.747304  | 0.000000 |
|  | C | -4.792774 | 2.767109  | 0.000000 |
|  | N | -4.764459 | 4.099625  | 0.000000 |
|  | C | -3.558656 | 4.667012  | 0.000000 |
|  | C | -3.555754 | 0.664139  | 0.000000 |
|  | N | -2.395747 | 0.029715  | 0.000000 |
|  | C | -1.27401  | 0.73555   | 0.000000 |
|  | N | -1.223607 | 2.05992   | 0.000000 |
|  | N | -5.932609 | 2.07633   | 0.000000 |
|  | C | -5.821079 | 0.748381  | 0.000000 |
|  | N | -4.717933 | 0.005013  | 0.000000 |
|  | N | 0.000000  | -4.130275 | 0.000000 |
|  | N | 3.576923  | 2.065137  | 0.000000 |
|  | N | 4.717933  | 0.005013  | 0.000000 |
|  | C | 3.555754  | 0.664139  | 0.000000 |
|  | C | 4.792774  | 2.767109  | 0.000000 |
|  | N | 5.932609  | 2.07633   | 0.000000 |
|  | C | 5.821079  | 0.748381  | 0.000000 |
|  | C | 2.353038  | 2.747304  | 0.000000 |
|  | N | 1.223607  | 2.05992   | 0.000000 |
|  | C | 1.27401   | 0.73555   | 0.000000 |
|  | N | 2.395747  | 0.029715  | 0.000000 |
|  | N | 4.764459  | 4.099625  | 0.000000 |
|  | C | 3.558656  | 4.667012  | 0.000000 |
|  | N | 2.363308  | 4.083344  | 0.000000 |
|  | H | 3.207024  | -5.952257 | 0.000000 |
|  | H | -3.551294 | 5.753492  | 0.000000 |
|  | H | -6.758318 | 0.198764  | 0.000000 |
|  | H | 6.758318  | 0.198764  | 0.000000 |
|  | H | -3.207024 | -5.952257 | 0.000000 |
|  | H | 3.551294  | 5.753492  | 0.000000 |

### Structural information of g-C<sub>3</sub>N<sub>4</sub> monolayer.

| lattice parameters (Å, °) |                    |                    |                    |
|---------------------------|--------------------|--------------------|--------------------|
|                           | a = b = 7.13205    | c = 20             |                    |
|                           | α = β = 90         | γ = 120            |                    |
| fractional coordinates    |                    |                    |                    |
|                           | x                  | y                  | z                  |
| C                         | 0.1194100009999985 | 0.0597100000000026 | 0.5000000000000000 |
| C                         | 0.4402900039999977 | 0.0597100000000026 | 0.5000000000000000 |
| C                         | 0.4402900039999977 | 0.3805800080000026 | 0.5000000000000000 |
| C                         | 0.2769599849999977 | 0.0539299989999975 | 0.5000000000000000 |
| C                         | 0.4460699859999977 | 0.2230399999999975 | 0.5000000000000000 |
| C                         | 0.2769599849999977 | 0.2230300009999979 | 0.5000000000000000 |
| C                         | 0.6194099780000002 | 0.0597100000000026 | 0.5000000000000000 |
| C                         | 0.9402899740000024 | 0.0597100000000026 | 0.5000000000000000 |
| C                         | 0.9402899740000024 | 0.3805800080000026 | 0.5000000000000000 |
| C                         | 0.7769600150000002 | 0.0539299989999975 | 0.5000000000000000 |
| C                         | 0.9460700149999965 | 0.2230399999999975 | 0.5000000000000000 |
| C                         | 0.7769600150000002 | 0.2230300009999979 | 0.5000000000000000 |
| C                         | 0.1194100009999985 | 0.5597100259999976 | 0.5000000000000000 |
| C                         | 0.4402900039999977 | 0.5597100259999976 | 0.5000000000000000 |
| C                         | 0.4402900039999977 | 0.8805800080000026 | 0.5000000000000000 |
| C                         | 0.2769599849999977 | 0.5539299850000035 | 0.5000000000000000 |
| C                         | 0.4460699859999977 | 0.7230399849999998 | 0.5000000000000000 |
| C                         | 0.2769599849999977 | 0.7230299710000025 | 0.5000000000000000 |
| C                         | 0.6194099780000002 | 0.5597100259999976 | 0.5000000000000000 |
| C                         | 0.9402899740000024 | 0.5597100259999976 | 0.5000000000000000 |
| C                         | 0.9402899740000024 | 0.8805800080000026 | 0.5000000000000000 |
| C                         | 0.7769600150000002 | 0.5539299850000035 | 0.5000000000000000 |
| C                         | 0.9460700149999965 | 0.7230399849999998 | 0.5000000000000000 |
| C                         | 0.7769600150000002 | 0.7230299710000025 | 0.5000000000000000 |
| N                         | 0.1692900059999971 | 0.0017300000000020 | 0.5000000000000000 |
| N                         | 0.4982700050000020 | 0.1675699950000009 | 0.5000000000000000 |
| N                         | 0.3324300049999991 | 0.3307099940000029 | 0.5000000000000000 |
| N                         | 0.4982700050000020 | 0.3307099940000029 | 0.5000000000000000 |
| N                         | 0.3324300049999991 | 0.0017300000000020 | 0.5000000000000000 |
| N                         | 0.1692900059999971 | 0.1675699950000009 | 0.5000000000000000 |
| N                         | 0.3333300050000005 | 0.1666699949999995 | 0.5000000000000000 |

|   |                    |                    |                    |
|---|--------------------|--------------------|--------------------|
| N | 0.0000000000000000 | 0.0000000000000000 | 0.5000000000000000 |
| N | 0.6692900059999971 | 0.0017300000000020 | 0.5000000000000000 |
| N | 0.9982699749999995 | 0.1675699950000009 | 0.5000000000000000 |
| N | 0.8324300049999991 | 0.3307099940000029 | 0.5000000000000000 |
| N | 0.9982699749999995 | 0.3307099940000029 | 0.5000000000000000 |
| N | 0.8324300049999991 | 0.0017300000000020 | 0.5000000000000000 |
| N | 0.6692900059999971 | 0.1675699950000009 | 0.5000000000000000 |
| N | 0.8333299760000017 | 0.1666699949999995 | 0.5000000000000000 |
| N | 0.5000000000000000 | 0.0000000000000000 | 0.5000000000000000 |
| N | 0.1692900059999971 | 0.5017300250000005 | 0.5000000000000000 |
| N | 0.4982700050000020 | 0.6675699950000009 | 0.5000000000000000 |
| N | 0.3324300049999991 | 0.8307099940000029 | 0.5000000000000000 |
| N | 0.4982700050000020 | 0.8307099940000029 | 0.5000000000000000 |
| N | 0.3324300049999991 | 0.5017300250000005 | 0.5000000000000000 |
| N | 0.1692900059999971 | 0.6675699950000009 | 0.5000000000000000 |
| N | 0.3333300050000005 | 0.6666700239999983 | 0.5000000000000000 |
| N | 0.0000000000000000 | 0.5000000000000000 | 0.5000000000000000 |
| N | 0.6692900059999971 | 0.5017300250000005 | 0.5000000000000000 |
| N | 0.9982699749999995 | 0.6675699950000009 | 0.5000000000000000 |
| N | 0.8324300049999991 | 0.8307099940000029 | 0.5000000000000000 |
| N | 0.9982699749999995 | 0.8307099940000029 | 0.5000000000000000 |
| N | 0.8324300049999991 | 0.5017300250000005 | 0.5000000000000000 |
| N | 0.6692900059999971 | 0.6675699950000009 | 0.5000000000000000 |
| N | 0.8333299760000017 | 0.6666700239999983 | 0.5000000000000000 |
| N | 0.5000000000000000 | 0.5000000000000000 | 0.5000000000000000 |
